# Supplementary material
Source: publisher figshare collection journal article supplement (https://karger.figshare.com/ndownloader/files/14740079)
Supplement: Supplementary file 1 [file 14740079]

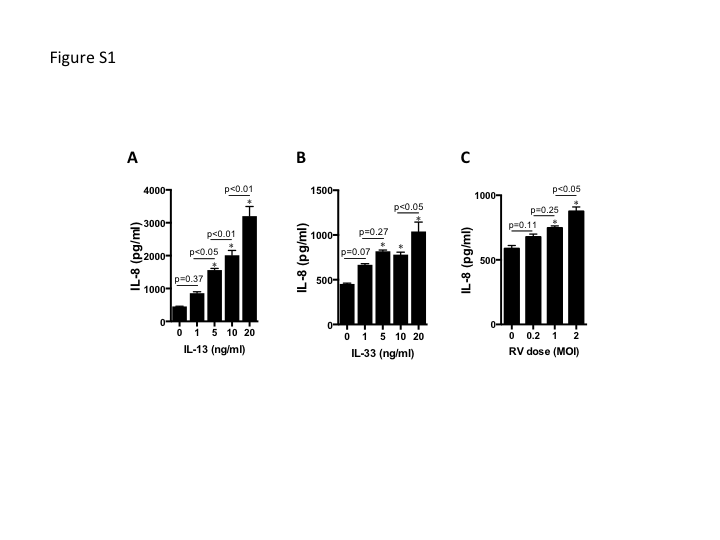


**Figure S1.** Dose-dependent IL-8 response to IL-13, IL-33, and Rhinovirus (RV). Primary human tracheobronchial epithelial cells were exposed to increasing doses of IL-13 (A), IL-33 (B), or RV16. Il-8 was measured in culture supernatants harvested 24 h after exposure. MOI: multiplicity of infection. Data are Mean ± SEM of n=4 replicates. *:p<0.05, compared to untreated cells (dose 0).

**
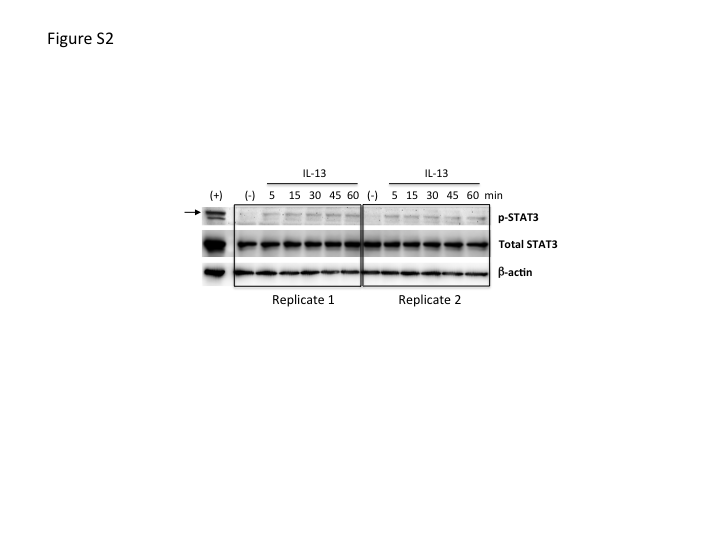
**

**Figure S2.** IL-13 mediated STAT3 activation in primary human tracheobronchial epithelial (HTBE) cells. HTBE cells were stimulated with IL-13 (10 ng/ml) for various time points (5 to 60 min). Controls consisted of cells stimulated for 10 min with 100 ng/ml of recombinant human epidermal growth factor (+) and cells that were unstimulated for 60 min (-). Expression of phospho-STAT3 (p-STAT3), total STAT3, and -actin was detected by Western blotting.
